# Supplementary material for: Evidence from Phylogenomics and Morphology Provide Insights into the Phylogeny, Plastome Evolution, and Taxonomy of Kitagawia
Source: MDPI journal article supplement (doi:10.3390/plants11233275), 2022-11-28
Supplement: s1 [file s1]

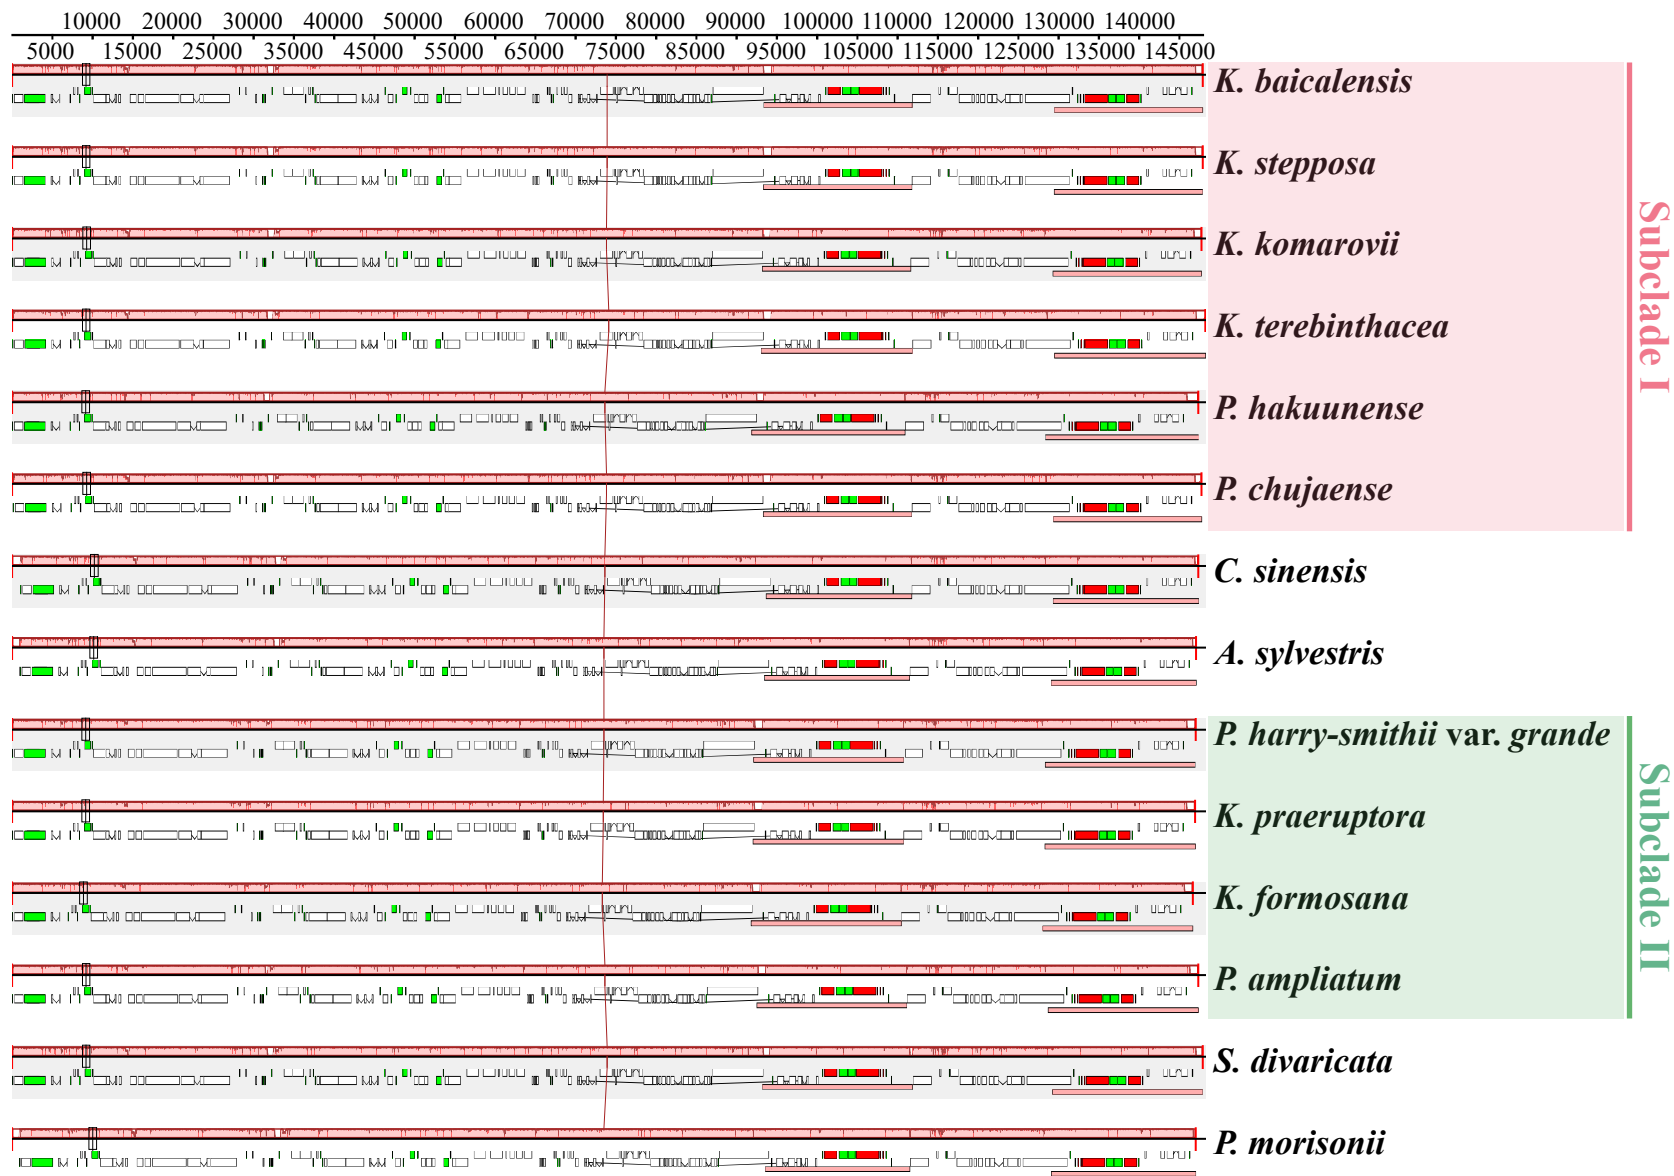

**Figure S2.** Mauve alignment of the 14 plastomes of *Kitagawia* and related taxa. Locally collinear block (LCB) within each alignment is represented by block of the same color connected with line.
